# Supplementary material for: Differential Protein Expression in Response to Abiotic Stress in Two Potato Species: Solanum commersonii Dun and Solanum tuberosum L
Source: Int J Mol Sci. 2013 Mar 1;14(3):4912–33. doi: 10.3390/ijms14034912 (PMC3634427; doi:10.3390/ijms14034912)
Supplement: Supplementary File 2 — Supplementary Table 1 (XLSX, 27 KB) [file ijms-14-04912-s002.xlsx]

## Sheet: Sheet1
Table S2.	Summary results of the analysis of two-dimensional gels. Spot, the number of the spot on the master gel; Ratio, the abundance of the proteins in the treated sample in Des (Solanum tuberosum L. cv. Désirée) and Com (S. commersonii). A t-test was done and represented as p-value < 0.05. n.s, ratio value was not significant; GI accession, accession number in the NCBInr database; Name, name of the pro…
Spot		Ratio											GI accession			Name		Species
		Sucrose			Sorbitol				Cold			Control
		Com		Des	Com		Des		Com	Des		CvsD
CH metabolism
1208		-3.82		n.s	-3.35		n.s		n.s	n.s		5.94	GI:	56562177		Carbonic anhydrase		Solanum lycopersicum
561		-1.54		-1.66	-1.32		-1.73		n.s	-1.55		1.27	GI:	306481954		RuBisCO large subunit		Solanum sp. SH-2010
546		-1.55		-1.96	-1.33		-1.83		n.s	-1.59		n.s	GI:	306481960		RuBisCO large subunit		Solanum sp. SH-2010
548		-1.94		-2.34	-1.39		-1.49		n.s	-1.75		1.76	GI:	306481960		RuBisCO large subunit		Solanum sp. SH-2010
532		-2.19		-2.7	-1.57		-2.54		n.s	-2.17		1.61	GI:	108773138		RuBisCO large subunit		Solanum tuberosum
534		n.s		-2.67	-1.5		-2.69		n.s	-2.02		1.67	GI:	306481956		RuBisCO large subunit		Solanum sp. SH-2010
1755		-1.64		-1.52	n.s		-1.6		n.s	-1.33		1.34	GI:	237784019		RuBisCO large subunit		Lycium deserti
535		n.s		-3.04	n.s		-2.3		n.s	n.s		2.46	GI:	306481960		RuBisCO large subunit		Solanum sp. SH-2010
536		n.s		-2.72	-1.61		-2.69		n.s	-2.13		1.94	GI:	306481964		RuBisCO large subunit		Solanum sp. SH-2010
552		n.s		-1.55	n.s		-1.71		n.s	-1.39		n.s	GI:	237784019		RuBisCO large subunit		Lycium deserti
1813		n.s		-2.43	n.s		-2.21		n.s	n.s		4.36	GI:	237784027		RuBisCO large subunit		Phrodus microphyllus
697		-2.04		n.s	n.s		-1.31		n.s	n.s		1.59	GI:	290586236		RuBisCO large subunit		Solanum laciniatum
685		-2.21		n.s	n.s		n.s		n.s	n.s		2.06	GI:	237784029		RuBisCO large subunit		Grabowskia glauca
604		n.s		n.s	n.s		n.s		1.59	n.s		1.57	GI:	125859071		RuBisCO large subunit		Lycium ferocissimum
1756		-2.11		-2.8	-1.45		-2.11		n.s	-2.03		1.33	GI:	125859071		RuBisCO large subunit		Lycium ferocissimum
691		-2.48		n.s	n.s		n.s		n.s	n.s		2.12	GI:	11182401		Ribulose-1,5-bisphosphate carboxylase/oxygenase		Lycium carolinianum var. sandwicense
1803		n.s		-1.75	n.s		-2		n.s	-2.06		n.s.	GI:	132071		RuBisCO small subunit C		Solanum tuberosum
1773		n.s		n.s	n.s		-1.89		n.s	-1.94		-2.04	GI:	132071		RuBisCO small subunit C		Solanum tuberosum
1591		-3.46		n.s	-3.2		-2.07		n.s	n.s		18.6	GI:	417593		RuBisCO small subunit 3		Solanum tuberosum
937		n.s		-2.09	-1.59		n.s		-2.15	-1.9		-1.62	GI:	38605155		Probable xyloglucan endotransglucosylase/hydrolase		Solanum lycopersicum
942		-1.63			n.s		n.s		n.s	n.s		n.s.	GI:	1706545		Glucan endo-1,3-beta-glucosidase, basic isoform 3		Solanum tuberosum
1143		n.s		-2.56	n.s		n.s		n.s	n.s		-1.44	GI:	225438529		Probable ATP synthase 24 kDa subunit, mitochondrial		Vitis vinifera
1182		n.s		-1.66	n.s		-1.65		n.s	n.s		n.s	GI:	77745458		Triose phosphate isomerase cytosolic isoform-like		Solanum tuberosum
906		n.s		-1.57	-1.55		n.s		-1.9	n.s		n.s	GI:	21388546		Putative mitochondrial NAD-dependent malate dehydrogenase		Solanum tuberosum
1544		n.s		n.s	n.s		1.98		n.s	n.s		5.18	GI:	73808794		Cytosolic nucleoside diphosphate kinase		Solanum chacoense
1319		n.s		n.s	n.s.		n.s.		-2.81	n.s		1.93	GI:	34787117		Putative photosystem I reaction centre PSI-D subunit precursor		Solanum tuberosum
1581		-2.72		-2.06	-2.99		-2.2		-2.55	-1.99		n.s.	GI:	270311593		Photosystem I reaction center subunit		Nicotiana tabacum
1740		-1.86		-1.74	-1.88		n.s.		-1.65	-1.33		1.36	GI:	2499967		Photosystem I reaction center subunit IV B, chloroplastic		Nicotiana sylvestris
1615		-1.74		-1.74	-1.66		-1.6		-1.92	-1.75		n.s.	GI:	197132134		Photosystem I subunit VII		Geranium carolinianum
1633		n.s		-1.52	-1.55		-1.9		-1.93	-1.66		n.s.	GI:	197132134		Photosystem I subunit VII		Geranium carolinianum
1655		n.s.		n.s.	n.s		n.s.		n.s.	-2.77		n.s.	GI:	228016106		Photosystem I subunit VII		Pinus rzedowskii
1526		-1.91		-1.8	-2.03		-2		-2.23	-2.23		n.s.	GI:	226491700		Photosystem II 11 kD protein		Zea mays
1741		n.s.		-2.38	n.s.		-1.98		n.s.	-1.85		n.s.	GI:	51457944		Photosystem II oxygen-evolving complex protein 3		Solanum lycopersicum
1705		-2.31		n.s.	-1.87		n.s.		-2.05	n.s.		n.s.	GI:	12644171		Oxygen-evolving enhancer protein 1, chloroplastic		Solanum lycopersicum
1121		-2.27		n.s.	-4.79		n.s.		-3.26	n.s.		1.68	GI:	12644171		Oxygen-evolving enhancer protein 1, chloroplastic		Solanum lycopersicum
1115		-2.48		n.s.	-2.46		n.s.		-2.27	n.s.		1.65	GI:	809113		33kDa precursor protein of oxygen-evolving complex		Solanum tuberosum
1470		-2.1		n.s.	n.s.		n.s.		-1.92	n.s.		1.65	GI:	255571642		Thylakoid lumenal 19 kDa protein, chloroplast precursor		Ricinus communis
1578		-2.88		n.s.	-2.38		-1.67		-1.85	-1.47		3.26	GI:	14275856		Subunit A of ferredoxin-thioredoxin-reductase		Solanum tuberosum
1807		-1.62		-2.12	-1.55		-2.19		-1.2	-1.83		n.s.	GI:	3913651		Ferredoxin--NADP reductase, leaf-type isozyme, chloroplastic		Nicotiana tabacum
1038		-2.01		n.s.	-1.76		-1.72		-1.52	-1.66		n.s.	GI:	61969078		Putative ferredoxin-NADP reductase		Solanum peruvianum
1710		-1.71		n.s.	-2.41		n.s.		-1.48	n.s.		2.23	GI:	115813		Chlorophyll a-b binding protein 8, chloroplastic		Solanum lycopersicum
1742		-1.53		-1.85	n.s.		-1.65		-2.41	n.s.		-1.85	GI:	130284		Plastocyanin		Solanum tuberosum
Protein metabolism
1343		-1.62		n.s.	-1.62		n.s.		n.s.	n.s.		1.68	GI:	7331143		Chaperonin 21 precursor		Solanum lycopersicum
567		n.s.		n.s.	n.s.		n.s.		n.s.	1.94		1.46	GI:	84468296		Putative RuBisCO subunit binding-protein alpha subunit		Trifolium pratense
1422		2.97		n.s.	3.24		2.37		1.97	n.s.		2.5	GI:	255547634		Peptidyl-prolyl cis-trans isomerase, putative		Ricinus communis
665		n.s.		n.s.	1.54		n.s.		n.s.	2.08		n.s.	GI:	21487		Leucine aminopeptidase		Solanum tuberosum
1785		1.73		1.45	n.s.		n.s.		n.s.	1.86		n.s.	GI:	135721		Threonine dehydratase biosynthetic, chloroplastic		Solanum lycopersicum
1743		3.04		n.s.	2.35		n.s.		n.s.	n.s.		-2.14	GI:	33327286		Polyubiquitin 2		Phaseolus vulgaris
1167				n.s.	n.s.		n.s.		n.s.	-1.54		-1.18	GI:	12229948		Proteasome subunit alpha type-6		Nicotiana tabacum
1132		-1.76		-1.6	-1.62		n.s.		n.s.	n.s.		n.s.	GI:	18404496		Binding / catalytic/ coenzyme binding		Arabidopsis thaliana
Transcription and Translation
958		-1.93		n.s.	-1.67		n.s.		n.s.	n.s.		n.s.	GI:	15226167		30 S Ribosomal protein S5 family protein		Arabidopsis thaliana
1589		n.s.		n.s.	n.s.		-1.63		n.s.	n.s.		n.s.	GI:	255551737		40S ribosomal protein S21e, putative		Ricinus communis
1413		n.s.		n.s.	n.s.		n.s.		n.s.	-1.94		n.s.	GI:	82623431		Putative transcription factor BTF3-like		Solanum tuberosum
848		n.s.		n.s.	n.s.		-1.46		n.s.	n.s.		n.s.	GI:	3850621		Putative RNA binding protein		Arabidopsis thaliana
Lipid metabolism
917		10.8		n.s.	5.35		n.s.		n.s.	n.s.		n.s.	GI:	122217722		Patatin-1-Kuras 2; Precursor		Solanum tuberosum
927		8.97		n.s.	4.93		n.s.		n.s.	n.s.		2.12	GI:	122217722		Patatin-1-Kuras 2, Precursor		Solanum tuberosum
Oxidative Homeostasis
1362		-1.88		n.s.	-2.2		n.s.		-2	-1.61		2.96	GI:	33413303		Superoxide dismutase [Fe]		Solanum lycopersicum
1330		n.s.		n.s.	n.s.		n.s.		-1.56	-1.69		-2.49	GI:	33413303		Superoxide dismutase [Fe]		Solanum lycopersicum
641		n.s.		n.s.	-1.68		-1.6		-1.55	-2.85		n.s.	GI:	295355		Peroxidase		Solanum lycopersicum
703		n.s.		n.s.	-1.9		-1.77		-1.64	-2.53		n.s.	GI:	295355		Peroxidase		Solanum lycopersicum
746		n.s.		n.s.	n.s.		-1.8		n.s.	-1.56		n.s.	GI:	218138216		Peroxidase 4		Litchi chinensis
577		2.11		n.s.	2.2		n.s.		n.s.	n.s.		n.s.	GI:	14031049		Peroxidase		Nicotiana tabacum
613		n.s.		n.s.	1.86		n.s.		n.s.	n.s.		n.s.	GI:	14031049		Peroxidase		Nicotiana tabacum
1053		n.s.		-2.25	n.s.		n.s.		n.s.	n.s.		n.s.	GI:	74483947		Cytosolic ascorbate peroxidase isoform 4		Solanum lycopersicum
926		5.27		n.s.	n.s.		n.s.		n.s.	n.s.		n.s.	GI:	21912927		Thioredoxin peroxidase		Nicotiana tabacum
1047		-1.51		-2.32	-1.9		-2.77		-1.79	-2.85		n.s.	GI:	3378208		Annexin p34		Solanum lycopersicum
951		-1.65		n.s.	n.s.		n.s.		-1.34	n.s.		2.14	GI:	255568816		Alcohol dehydrogenase, putative		Ricinus communis
Response to stress
396		n.s.		1.42	n.s.		n.s.		1.55	1.4		n.s.	GI:	108864707		Heat shock cognate 70 kDa protein, putative, expressed		Oryza sativa (japonica cultivar-group)
1748		n.s.		n.s.	n.s.		n.s.		n.s.	2.39		n.s.	GI:	51317936		Pathogenesis-related protein 10		Solanum virginianum
1305		-1.64		-1.93	-1.51		-1.57		n.s.	-1.56		1.78	GI:	123965222		Germin-like protein		Capsicum chinense
1350		-1.33		-1.9	n.s.		-1.56		-1.3	-1.35		n.s.	GI:	31711507		24K germin like protein		Nicotiana tabacum
1716		n.s.		n.s.	-1.61		n.s.		n.s.	n.s.		n.s.	GI:	123965222		Germin-like protein		Capsicum chinense
1178		n.s.		n.s.	-2.56		n.s.		-3.86	n.s.		17.1	GI:	53830836		Osmotin-like protein		Solanum tuberosum
1235		3.68		n.s.	n.s.		n.s.		n.s.	n.s.		-2.58	GI:	53830841		Osmotin-like protein		Solanum tuberosum
1190		9.29		n.s.	9.75		4.9		3.01	3.41		n.s.	GI:	20137277		Aspartic protease inhibitor 5; Precursor		Solanum tuberosum
1289		6.99		n.s.	4.33		n.s.		n.s.	n.s.		8.34	GI:	124148		Aspartic protease inhibitor 11		Solanum tuberosum
1323		3		n.s.	3.4		5.24		n.s.	3.92		n.s.	GI:	73920899		Kunitz-type protease inhibitor precursor		Solanum tuberosum
1450		n.s.		n.s.	n.s.		4.87		n.s.	4.27		-2.14	GI:	73920899		Kunitz-type protease inhibitor precursor		Solanum tuberosum
1584		n.s.		n.s.	n.s.		n.s.		-1.71	n.s.		-3.21	GI:	73920899		Kunitz-type protease inhibitor precursor		Solanum tuberosum
1746		9.21		n.s.	13.3		n.s.		n.s.	n.s.		n.s.	GI:	73920899		Kunitz-type protease inhibitor precursor		Solanum tuberosum
1310		n.s.		n.s.	n.s.		6.91		n.s.	4.6		n.s.	GI:	238684523		Kunitz-type proteinase inhibitor group A5		Solanum tuberosum subsp. andigena
1711		n.s.		n.s.	n.s.		4.87		n.s.	3.54		-3.65	GI:	239735943		Kunitz-type proteinase inhibitor A6		Solanum palustre
1474		n.s.		n.s.	n.s.		3.15		n.s.	n.s.		n.s.	GI:	14329818		Putative miraculin		Atropa belladonna
1396		-1.65		n.s.	n.s.		n.s.		-1.92	n.s.		1.66	GI:	585699		Cysteine protease inhibitor 9		Solanum tuberosum
1477		n.s.		n.s.	n.s.		3.77		n.s.	n.s.		-9.67	GI:	3913948		Proteinase inhibitor type-2; Precursor		Solanum tuberosum
1494		n.s.		n.s.	n.s.		3.74		n.s.	n.s.		-5.36	GI:	3913948		Proteinase inhibitor type-2;Precursor		Solanum tuberosum
1499		n.s.		n.s.	n.s.		2		n.s.	n.s.		-3.62	GI:	3913948		Proteinase inhibitor type-2; Precursor		Solanum tuberosum
1610		n.s.		n.s.	-2.08		n.s.		-2.02	n.s.		11.8	GI:	462765		Auxin-induced proteinase inhibitor		Solanum lycopersicum
1377		n.s.		2.76	n.s.		11.8		n.s.	10.8		n.s.	GI:	58373382		Proteinase inhibitor Iib		Solanum americanum
1739		5.5		n.s.	6.38		3.06		n.s.	n.s.		-4.66	GI:	21528		Proteinase inhibitor I		Solanum tuberosum
1662		5.12		n.s.	3.5		2.65		n.s.	n.s.		-5.54	GI:	268374352		Type I serine protease inhibitor		Solanum tuberosum
1639		n.s.		n.s.	n.s.		n.s.		n.s.	-1.78		-1.67	GI:	1706276		Cysteine proteinase inhibitor A		Helianthus annuus
